# Supplementary material for: The fluctuating standard potential of lithium in organic solvents
Source: Royal Society of Chemistry journal article supplement (doi:10.1039/d2cc00769j), 2022-01-01
Supplement: d2cc00769j1.pdf [file d2cc00769j1.pdf]

## Electronic Supplementary Information

### The fluctuating standard potential of lithium in organic solvents

Bohai Zhang,<sup>a</sup> Yunzhe Jia,<sup>a,b</sup> Yuhao Zhou,<sup>a</sup> Shihai Ye,<sup>a</sup> Tianying Yan<sup>\*,a</sup> and Xue-Ping Gao<sup>\*,a</sup>

<sup>a</sup>Institute of New Energy Material Chemistry, School of Materials Science and Engineering, Nankai University, Tianjin 300350, China.

<sup>b</sup>Current address: Beijing National Laboratory for Condensed Matter Physics and Institute of Physics, Chinese Academy of Sciences, Beijing 100190, China.

\*Corresponding author. E-mail: tyan@nankai.edu.cn (T. Yan); xpgao@nankai.edu.cn (X. P. Gao).

#### S1. *Ab initio* calculation.

The geometrical optimizations of the solvent molecule ( $S = \text{H}_2\text{O}$ , AN, TMS, PC, DOL, THF, DME, DMA, DMSO, TMU, and DCE) as well as the  $\text{Li}^+(\text{S})_n$  clusters were performed at M06-2X/6-31+G(d) level of theory<sup>1</sup> with D3 dispersion correction<sup>2</sup> in gas phase. The optimized structures were subjected to the normal mode analyses, and ensured that no imaginary frequency presents. The calculations of Gibbs free energies of Li-ions, solvent molecule  $S$ , and  $\text{Li}^+(\text{S})_n$  cluster in the gas-phase at standard condition ( $P = 1$  atm and  $T = 298.15$  K) are discussed in Sec. S2. The solvation free energies ( $\Delta G^*(\text{Li}^+(s))$ ) of Li-ion in solvent ( $s$ ) was obtained by cluster-continuum model,<sup>3</sup> as discussed in Sec. S3. The self-solvation Gibbs free energies of the solvent molecule  $S$  in its own solvent ( $s$ ),  $\Delta G^*(S(s))$ , and the solvation Gibbs free energies of  $\text{Li}^+(\text{S})_n$  cluster,  $\Delta G^*(\text{Li}^+(\text{S})_n(s))$ , were calculated by SMD solvation model<sup>4</sup> at M06-2X/6-31+G(d) level of theory.<sup>1</sup> Table S1 lists the descriptors that characterize the solvent in SMD solvation model. All the calculations were performed with Gaussian 16 program.<sup>5</sup>

**Table S1.** The descriptors<sup>a</sup> of  $\text{H}_2\text{O}$ , AN, TMS, PC, DOL, THF, DME, DMA, DMSO, TMU, and DCE, in the *ab initio* calculations with SMD solvation model.<sup>4</sup>

| S ( <i>s</i> )         | Abbr.                | $\epsilon^b$        | $n_D^c$             | $\gamma^d$          | $\beta^e$            |
|------------------------|----------------------|---------------------|---------------------|---------------------|----------------------|
| Water                  | $\text{H}_2\text{O}$ | 78.355 <sup>6</sup> | 1.3328 <sup>6</sup> | $\mathcal{J}$       | $\mathcal{J}$        |
| Acetonitrile           | AN                   | 35.688 <sup>6</sup> | 1.3442 <sup>6</sup> | 41.25 <sup>6</sup>  | 0.32 <sup>7</sup>    |
| Tetramethylene sulfone | TMS                  | 44 <sup>8</sup>     | 1.496 <sup>9</sup>  | 69.02 <sup>10</sup> | 0.88 <sup>7, g</sup> |
| Propylene carbonate    | PC                   | 65.5 <sup>8</sup>   | 4.421 <sup>9</sup>  | 66.77 <sup>10</sup> | 0.45 <sup>7, h</sup> |
| 1,3-Dioxolane          | DOL                  | 7.34 <sup>8</sup>   | 1.399 <sup>9</sup>  | 46.85 <sup>10</sup> | 0.41 <sup>7, i</sup> |
| Tetrahydrofuran        | THF                  | 7.4257 <sup>6</sup> | 1.4050 <sup>6</sup> | 39.44 <sup>11</sup> | 0.48 <sup>7</sup>    |
| 1,2-Dimethoxyethane    | DME                  | 7.22 <sup>6</sup>   | 1.377 <sup>6</sup>  | 33.18 <sup>12</sup> | 0.41 <sup>7, i</sup> |
| N,N-dimethylformamide  | DMA                  | 37.219 <sup>6</sup> | 1.4305 <sup>6</sup> | 49.56 <sup>13</sup> | 0.74 <sup>7</sup>    |
| Dimethyl sulfoxide     | DMSO                 | 46.826 <sup>6</sup> | 1.4783 <sup>6</sup> | 61.78 <sup>6</sup>  | 0.88 <sup>14</sup>   |
| Tetramethylurea        | TMU                  | 74.6 <sup>8</sup>   | 1.450 <sup>6</sup>  | 47.51 <sup>10</sup> | 0.74 <sup>7, j</sup> |

|                    |     |                     |                     |                    |                   |
|--------------------|-----|---------------------|---------------------|--------------------|-------------------|
| 1,2-Dichloroethane | DCE | 10.125 <sup>6</sup> | 1.4448 <sup>6</sup> | 45.86 <sup>6</sup> | 0.11 <sup>7</sup> |
|--------------------|-----|---------------------|---------------------|--------------------|-------------------|

<sup>a</sup>Abraham's hydrogen bond acidity, aromaticity, and electronegative halogenicity are all set to zero in the SMD solvation mode, except for DCE, which has Abraham's hydrogen bond acidity of 0.10;<sup>7</sup>

<sup>b</sup>Dielectric constant; <sup>c</sup>Index of refraction; <sup>d</sup>Surface tension ( $\text{cal} \cdot \text{mol}^{-1} \cdot \text{\AA}^{-2}$ ); <sup>e</sup>Abraham's hydrogen bond basicity. For a solvent with unknown  $\beta$ , it is taken from a solvent of similar structure with known  $\beta$ ; <sup>f</sup>Not needed by SMD for water; <sup>g</sup>Taken from DMSO; <sup>h</sup>Taken from esters; <sup>i</sup>Taken from diethyl ether; <sup>j</sup>Taken from DMA.

## S2. The Gibbs free energy of Li-ion, solvent molecule (S), and $\text{Li}^+(\text{S})_n$ cluster in the gas-phase.

In this section, we derive the Gibbs free energy of Li-ion, solvent molecule (S), and  $\text{Li}^+(\text{S})_n$  cluster in the gas-phase at standard condition ( $P = 1 \text{ atm}$  and  $T = 298.15 \text{ K}$ ), based on that described by Hill,<sup>15</sup> with the vibrational entropy proposed by Grimme,<sup>16</sup> and the gas-phase substance is 1 mole.

Assuming an ideal-gas consisting of single component of  $\text{Li}^+$ , solvent molecule (S), or  $\text{Li}^+(\text{S})_n$ , the partition function is

$$Q = \frac{q^{N_A}}{N_A!} \quad (\text{S1})$$

in which  $q$  denotes the partition function of an isolated Li-ion, an isolated solvent molecule (S), or an isolated  $\text{Li}^+(\text{S})_n$  cluster in the gas-phase, and  $N_A = 6.02214179 \times 10^{23} \text{ mol}^{-1}$  is Avogadro's constant.  $N_A!$  in the denominator is the correction factor, due to the translational invariance of the identical and indistinguishable an ensemble of Li-ions, solvent molecules, or  $\text{Li}^+(\text{S})_n$  clusters in the gas-phase.

Neglecting the coupling among the translational, rotational, vibrational, and electronic degrees of freedom,  $q$  can be expressed as

$$q = q_t \cdot q_r \cdot q_v \cdot q_e \quad (\text{S2})$$

in which  $q_t$ ,  $q_r$ ,  $q_v$ , and  $q_e$  denote the translational, rotational, vibrational, and electronic partition function, respectively, for an isolated Li-ion, an isolated solvent molecule (S), or an isolated  $\text{Li}^+(\text{S})_n$  cluster in the gas-phase.

From Eqs. S1 and S2, the molar Helmholtz free energy of 1 mole ( $N_A$ ) Li-ions, solvent molecules, or  $\text{Li}^+(\text{S})_n$  is

$$A = -kT \ln Q = -RT \left( \ln \frac{q_t e}{N_A} + \ln q_r + \ln q_v + \ln q_e \right) = A_t + A_r + A_v + A_e \quad (\text{S3})$$

in which  $A_t$ ,  $A_r$ ,  $A_v$ , and  $A_e$  are individual contribution to  $A$  from translational, rotational, vibrational and electronic degrees of freedom,  $k = 1.3806503 \times 10^{-23} \text{ J}\cdot\text{K}^{-1}$  is Boltzmann's constant,  $R = N_A k = 8.31447187 \text{ J}\cdot\text{K}^{-1}\cdot\text{mol}^{-1}$  is the ideal-gas constant, and  $e$  is the base of the natural logarithm. In deriving Eq. S3, Sterling approximation,  $\ln N_A! = N_A \ln N_A - N_A$  is used.

### S2.1. Translational contribution.

The translational partition function  $q_t$  of an isolated ion/molecule/cluster is

$$q_t = \left( \frac{2\pi m k T}{h^2} \right)^{3/2} \cdot V_A = \frac{V_A}{\Lambda^3} \quad (\text{S4})$$

in which the de Broglie wavelength is

$$\Lambda = \frac{h}{(2\pi m k T)^{1/2}} \quad (\text{S5})$$

in which  $h = 6.6260696 \times 10^{-34} \text{ J}\cdot\text{s}$  is Planck's constant,  $m$  is mass of a Li-ion, a solvent molecule (S), or a  $\text{Li}^+(\text{S})_n$  cluster. In the above equation,

$$V_A = \frac{RT}{P} = 0.02446543 \text{ m}^3 \quad (\text{S6})$$

is the molar volume of the ideal-gas at  $P = 1 \text{ atm}$  and  $T = 298.15 \text{ K}$ .

From Eqs. S3 and S4, the translational contribution to  $A$  is

$$A_t = -RT \ln \frac{V_A e}{\Lambda^3 N_A} \quad (\text{S7})$$

in which  $\Lambda$  is calculated by Eq. S5 with the molecular mass of Li-ion, solvent molecule (S), or  $\text{Li}^+(\text{S})_n$  cluster of interest. For the Li-ions, the only thermodynamic correction in the free energy is the translational contribution.

### S2.2. Rotational contribution.

For a nonlinear solvent molecule (S) or  $\text{Li}^+(\text{S})_n$  cluster, the rotational partition function is

$$q_r = \frac{\pi^{1/2}}{\sigma} \cdot \left( \frac{T^3}{\Theta_A \Theta_B \Theta_C} \right)^{1/2} \quad (\text{S8})$$

in which the characteristic rotational (Debye) temperatures are

$$\Theta_A = \frac{h^2}{8\pi^2 I_A k}, \quad \Theta_B = \frac{h^2}{8\pi^2 I_B k}, \quad \Theta_C = \frac{h^2}{8\pi^2 I_C k} \quad (\text{S9})$$

in which  $I_A$ ,  $I_B$ , and  $I_C$  are the principal moments of inertia of a solvent molecule (S) or  $\text{Li}^+(\text{S})_n$  cluster, and  $\sigma$  is rotational symmetry number as correction to the repeated counting of the indistinguishable configurations of rotation, as given below for the point group of the solvent molecule (S) or  $\text{Li}^+(\text{S})_n$  cluster of interest in this study.

| Point group | $C_n$ , $C_{nv}$ | $S_n$ | $T_d$ |
|-------------|------------------|-------|-------|
| $\sigma$    | $n$              | $n/2$ | 12    |

From Eqs. S3 and S8, the rotational contribution to  $A$  is

$$A_r = -RT \ln \left[ \frac{\pi^{1/2}}{\sigma} \cdot \left( \frac{T^3}{\Theta_A \Theta_B \Theta_C} \right)^{1/2} \right] \quad (\text{S10})$$

in which the Debye temperatures were calculated by Eq. S9, with the principal moments of inertia obtained from the *ab initio* optimized configuration of the solvent molecule (S) or  $\text{Li}^+(\text{S})_n$  cluster of interest in the gas-phase.

### S2.3. Vibrational contribution.

The vibrational partition function of an isolated molecule/cluster is

$$q_v = \prod_{i=1}^{3N-6} q_{i,v} \quad (\text{S11})$$

in which  $i$  denotes the  $i$ th vibrational mode  $\nu_i$  and there are totally  $3N - 6$  such modes for a nonlinear solvent molecule (S) or  $\text{Li}^+(\text{S})_n$  cluster consisting of  $N$  atoms. The one-dimensional vibrational partition function of  $\nu_i$  in Eq. S11 is given by the harmonic approximation, *i.e.*,

$$q_{i,v} = \frac{e^{-\Phi_i/2T}}{1 - e^{-\Phi_i/T}} \quad (\text{S12})$$

in which  $\Phi_i$  is the vibrational characteristic (Einstein) temperature of  $\nu_i$ , *i.e.*,

$$\Phi_i = \frac{h\nu_i}{k} \quad (\text{S13})$$

From Eqs. S3 and S11, the vibration contribution to  $A$ , using harmonic approximation, is

$$A_{v,h} = -RT \ln \prod_{i=1}^{3N-6} q_{i,v} = \sum_{i=1}^{3N-6} \left[ \frac{R\Phi_i}{2} + a_{i,h} \right] \quad (\text{S14})$$

In the above equation, the first term on the last expression is the zero-point energy (ZPE) of  $\nu_i$ , and the last term is the Helmholtz free energy of  $\nu_i$ , which contributes to  $A_{v,h}$  as

$$a_{i,h} = RT \ln \left( 1 - e^{-\frac{\Phi_i}{T}} \right) = u_{i,h} - T s_{i,h} \quad (\text{S15})$$

in which  $a_{i,h}$ ,  $u_{i,h}$ , and  $s_{i,h}$  are the Helmholtz free energy, internal energy, and entropy of  $\nu_i$  with Harmonic approximation, respectively.

Since the harmonic approximation overestimates vibrational entropy, especially at low frequency, which is often attributed to the hindered rotation, Grimme proposed to interpolate vibrational entropy between harmonic approximation and rigid rotation,<sup>16</sup> *i.e.*,

$$s_{i,v} = w_i s_{i,h} + (1 - w_i) s_{i,r} \quad (\text{S16})$$

in which the weighting factor  $w_i$  is

$$w_i = \frac{1}{1 + (\nu_0/\nu_i)^\alpha} \quad (\text{S17})$$

in which  $\nu_0 = 100 \text{ cm}^{-1}$  and  $\alpha = 4$  are empirically determined for the best interpolation.<sup>16</sup>

In Eq. S16, the harmonic vibrational contribution to  $s_{i,v}$  can be derived from Eq. S12, *i.e.*,

$$s_{i,h} = R \ln q_{i,v} + RT \left( \frac{\partial \ln q_{i,v}}{\partial T} \right)_v = R \left[ \frac{\Phi_i/T}{e^{\Phi_i/T} - 1} - \ln (1 - e^{-\Phi_i/T}) \right] \quad (\text{S18})$$

Since the one-dimensional rotational partition function of frequency  $\nu_i$  can be written as

$$q_{i,r} = \left( \frac{\pi T}{\Theta_i} \right)^{1/2} \quad (\text{S19})$$

in which the effective Debye temperature is

$$\Theta_i = \frac{h^2}{8\pi^2 \mu_i k} \quad (\text{S20})$$

with the effective moment of inertia  $\mu_i$  of  $\nu_i$  being<sup>16</sup>

$$\mu_i = \frac{\mu'_i B_{av}}{\mu'_i + B_{av}}, \quad \text{and} \quad \mu'_i = \frac{h}{8\pi^2 \nu_i} \quad (\text{S21})$$

in which  $B_{av} = 10^{-44} \text{ kg}\cdot\text{m}^2$  corresponds to the average molecular moment of inertia and was empirically determined.<sup>16</sup>

From Eq. S19, the rigid rotor contribution to  $s_{i,v}$  in Eq. S16 is

$$s_{i,r} = R \ln q_{i,r} + RT \left( \frac{\partial \ln q_{i,r}}{\partial T} \right)_v = \frac{R}{2} \left[ 1 + \ln \left( \frac{\pi T}{\Theta_i} \right) \right] \quad (\text{S22})$$

Since  $s_{i,h}$  in Eq. S15 should be replaced by  $s_{i,v}$  in Eq. S16, as the corrected contribution to the Helmholtz free energy of  $v_i$  proposed by Grimme,<sup>16</sup>  $a_{i,h}$  in Eq. S14 is correspondingly replaced by

$$a_{i,v} = a_{i,h} + Ts_{i,h} - T[w_i s_{i,h} + (1 - w_i)s_{i,r}] = a_{i,h} + (1 - w_i)T(s_{i,h} - s_{i,r}) \quad (S23)$$

Thus, corrected Helmholtz free energy is

$$A_{v,h} = \sum_{i=1}^{3N-6} \left[ \frac{R\Phi_i}{2} + a_{i,v} \right] \quad (S24)$$

in which Einstein temperature can be calculated by Eq. S13, and the effective Debye temperature can be calculated by Eqs. S20 and S21, respectively, using the normal mode vibrational frequencies from the optimized structure of the solvent molecule (S) or  $\text{Li}^+(\text{S})_n$  cluster of interest in the gas-phase by *ab initio* calculations.

#### S2.4. Electronic contribution.

For the closed shell ion/molecule/cluster with large electronic energy gap investigated in this study, only the electronic ground state is occupied with degeneracy of 1, so that the electronic partition function is

$$q_e = e^{-\varepsilon_0/kT} \quad (S25)$$

in which  $\varepsilon_0$  is the electronic energy of an isolated Li-ion, an isolated solvent molecule (S), or  $\text{Li}^+(\text{S})_n$  cluster in the gas-phase.

From Eqs. S3 and S25, the electronic contribution to  $A$  is

$$A_e = N_A \varepsilon_0 = E_0 \quad (S26)$$

in which the relation  $N_A = R/k$  is used, and  $E_0$  is the molar electronic energy of Li-ions, or the optimized structure of solvent molecule (S) or  $\text{Li}^+(\text{S})_n$  cluster by *ab initio* calculations.

#### S2.5. Gibbs free energy in the gas-phase.

Once Helmholtz free energy in Eq. S3 is calculated by the individual contribution from Eqs. S7, S10, S24, and S26, Gibbs free energy can be calculated as

$$G = A + PV = A + RT \quad (S27)$$

in which the relation  $PV = RT$  for 1 mole ideal-gas is used.

**S2.6. Gibbs free energies of Li-ion, solvent molecule (S), and Li<sup>+</sup>(S)<sub>n</sub> cluster, as well as the formation Gibbs free energies of Li<sup>+</sup>(S)<sub>n</sub> in the gas-phase.**

Table S2 lists the Gibbs free energies of Li-ion, solvent molecule (S = H<sub>2</sub>O, AN, TMS, PC, DOL, THF, DME, DMA, DMSO, TMU, and DCE), and the corresponding Li<sup>+</sup>(S)<sub>n</sub> clusters, obtained by *ab initio* calculation at M06-2X/6-31+G(d) level of theory<sup>1</sup> with D3 dispersion correction<sup>2</sup> in the gas-phase. According to previous study,<sup>17</sup> Li<sup>+</sup>(S)<sub>n</sub> clusters were optimized with Li<sup>+</sup> coordinating with 4 electronegative atoms, contributed from different solvent molecules with n = 2, 3, or 4.

**Table S2.** Gibbs free energy of Li-ion, solvent molecule (S = H<sub>2</sub>O, AN, TMS, PC, DOL, THF, DME, DMA, DMSO, TMU, and DCE), and Li<sup>+</sup>(S)<sub>n</sub> cluster, and the Gibbs free energy of formation of Li<sup>+</sup>(S)<sub>n</sub> clusters in the gas-phase at standard condition (*P* = 1 atm and *T* = 298.15 K).

| Rxn. | $G^\circ(\text{Li}^+)^a$ |   | $nG^\circ(\text{S})^a$                   | $\Delta G_f^\circ{}^b$ | $G^\circ(\text{Li}^+(\text{S})_n)^a$                                               | S <sup>c</sup>                                                                        | Li <sup>+</sup> (S) <sub>n</sub> <sup>d</sup>                                         |
|------|--------------------------|---|------------------------------------------|------------------------|------------------------------------------------------------------------------------|---------------------------------------------------------------------------------------|---------------------------------------------------------------------------------------|
| 1    | Li <sup>+</sup> (g)      | + | 4H <sub>2</sub> O (g)<br>C <sub>2v</sub> | →                      | Li <sup>+</sup> (H <sub>2</sub> O) <sub>4</sub> (g)<br>C <sub>1</sub> <sup>e</sup> |    |    |
|      | -7.293797                |   | -305.519887                              | <b>-78.14</b>          | -312.938215                                                                        |                                                                                       |                                                                                       |
| 2    | Li <sup>+</sup> (g)      | + | 4AN (g)<br>C <sub>3v</sub>               | →                      | Li <sup>+</sup> (AN) <sub>4</sub> (g)<br>T <sub>d</sub>                            |  |  |
|      |                          |   | -530.697487                              | <b>-81.17</b>          | -538.120639                                                                        |                                                                                       |                                                                                       |
| 3    | Li <sup>+</sup> (g)      | + | 3TMS (g)<br>C <sub>2</sub>               | →                      | Li <sup>+</sup> (TMS) <sub>3</sub> (g) <sup>f</sup><br>C <sub>2</sub>              |  |  |
|      |                          |   | -2116.684064                             | <b>-91.50</b>          | -2124.123675                                                                       |                                                                                       |                                                                                       |
| 4    | Li <sup>+</sup> (g)      | + | 4PC (g)<br>C <sub>1</sub>                | →                      | Li <sup>+</sup> (PC) <sub>4</sub> (g)<br>C <sub>2</sub>                            |  |  |
|      |                          |   | -1526.007717                             | <b>-85.34</b>          | -1533.437513                                                                       |                                                                                       |                                                                                       |
| 5    | Li <sup>+</sup> (g)      | + | 4DOL (g)<br>C <sub>1</sub>               | →                      | Li <sup>+</sup> (DOL) <sub>4</sub> (g)<br>S <sub>4</sub>                           |  |  |
|      |                          |   | -1072.687338                             | <b>-73.86</b>          | -1080.098846                                                                       |                                                                                       |                                                                                       |
| 6    | Li <sup>+</sup> (g)      | + | 4THF (g)<br>C <sub>2</sub>               | →                      | Li <sup>+</sup> (THF) <sub>4</sub> (g)<br>S <sub>4</sub>                           |  |  |
|      |                          |   | -929.012142                              | <b>-82.46</b>          | -936.437354                                                                        |                                                                                       |                                                                                       |
| 7    | Li <sup>+</sup> (g)      | + | 2DME (g)<br>C <sub>2</sub>               | →                      | Li <sup>+</sup> (DME) <sub>2</sub> (g)<br>C <sub>2</sub>                           |  |  |
|      |                          |   | -617.213223                              | <b>-86.13</b>          | -624.6442827                                                                       |                                                                                       |                                                                                       |
| 8    | Li <sup>+</sup> (g)      | + | 4DMA (g)<br>C <sub>1</sub>               | →                      | Li <sup>+</sup> (DMA) <sub>4</sub> (g)<br>S <sub>4</sub>                           |                                                                                       |                                                                                       |

|    |                     |   |                |                |                                         |                                                                                     |                                                                                     |
|----|---------------------|---|----------------|----------------|-----------------------------------------|-------------------------------------------------------------------------------------|-------------------------------------------------------------------------------------|
|    |                     |   | -1150.400604   | <b>-100.13</b> | -1157.853967                            | 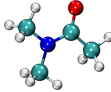 |  |
| 9  | Li <sup>+</sup> (g) | + | 4DMSO (g)      | →              | Li <sup>+</sup> (DMSO) <sub>4</sub> (g) |                                                                                     |                                                                                     |
|    |                     |   | C <sub>1</sub> |                | S <sub>4</sub>                          |  |  |
|    |                     |   | -2212.095478   | <b>-112.77</b> | -2219.568984                            |                                                                                     |                                                                                     |
| 10 | Li <sup>+</sup> (g) | + | 4TMU (g)       | →              | Li <sup>+</sup> (TMU) <sub>4</sub> (g)  |                                                                                     |                                                                                     |
|    |                     |   | C <sub>2</sub> |                | C <sub>2</sub>                          |  |  |
|    |                     |   | -1528.715400   | <b>-102.20</b> | -1536.172065                            |                                                                                     |                                                                                     |
| 11 | Li <sup>+</sup> (g) | + | 2DCE (g)       | →              | Li <sup>+</sup> (DCE) <sub>2</sub> (g)  |                                                                                     |                                                                                     |
|    |                     |   | C <sub>2</sub> |                | C <sub>2</sub>                          |  |  |
|    |                     |   | -1997.865796   | <b>-51.08</b>  | -2005.240275                            |                                                                                     |                                                                                     |

<sup>a</sup>*Ab initio* calculations of Li-ion, solvent molecule (S), and Li<sup>+</sup>(S)<sub>n</sub> cluster were performed at M06-2X/6-31+G(d) level of theory<sup>1</sup> with D3 dispersion correction,<sup>2</sup> with the Gibbs free energy (a.u., and 1 a.u. = 627.5095 kcal·mol<sup>-1</sup>) of  $G^\circ(\text{Li}^+)$ ,  $G^\circ(\text{S})$ , and  $G^\circ(\text{Li}^+(\text{S})_n)$  in the gas-phase calculated

by Eq. (S27); <sup>b</sup>Gibbs free energy of formation (kcal·mol<sup>-1</sup>) of Li<sup>+</sup>(S)<sub>n</sub> cluster in the gas-phase, calculated by  $\Delta G_f^\circ = G^\circ(\text{Li}^+(\text{S})_n) - G^\circ(\text{Li}^+) - nG^\circ(\text{S})$ ; <sup>c</sup>Optimized structure of the solvent molecule in the gas-phase by *ab initio* calculation. The white, cyan, blue, red, yellow, and orange balls denote hydrogen, carbon, nitrogen, oxygen, sulfur, and chlorine atoms, respectively; <sup>d</sup>Optimized structure of Li<sup>+</sup>(S)<sub>n</sub> cluster in the gas-phase by *ab initio* calculation. The green ball denotes lithium atom; <sup>e</sup>Attempts on optimizing Li<sup>+</sup>(H<sub>2</sub>O)<sub>4</sub> with higher symmetry, such as C<sub>2</sub> and S<sub>4</sub>, result in imaginary frequencies with M06-2X/6-31+G(d) with D3 employed in this study, though S<sub>4</sub> symmetry should be more reasonable;<sup>18</sup> <sup>f</sup>For Li<sup>+</sup>(TMS)<sub>n</sub>,  $\Delta G_f^\circ = -73.21$  kcal·mol<sup>-1</sup> for n = 2 with D<sub>2</sub> symmetry, which is much higher than that for n = 3 by 18.29 kcal·mol<sup>-1</sup>. Thus, the computation of the Gibbs free energy of solvation of Li<sup>+</sup> in TMS was performed with Li<sup>+</sup>(TMS)<sub>3</sub> using cluster-continuum model.<sup>3</sup>

### S3. Thermodynamic cycle for calculating the Gibbs free energy of solvation, $\Delta G^*(\text{Li}^+(\text{s}))$ , of Li-ion in solvent (s) by cluster-continuum model.

The solvation of Li-ion from the gas-phase to solution phase can be represented by the following equilibrium,

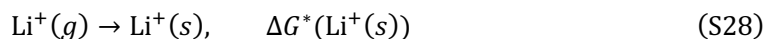



in which  $\text{Li}^+(g)$  denotes that Li-ions the gas-phase and  $\text{Li}^+(s)$  denotes Li-ion the solution phase of a specific solvent ( $s$ ), both at condition with  $c_0 = 1 \text{ M}$  and  $T = 298.15 \text{ K}$ , according to the convention proposed by Ben-Naim.<sup>19</sup>

Though the Gibbs free energy of solvation  $\Delta G^*(\text{Li}^+(s))$ , corresponding to Eq. S28, may be calculated directly by SMD solvation model<sup>4</sup> with *ab initio* calculations described in Sec. S1, the accuracy of such direct calculation is often not satisfactory due to the ionic nature of  $\text{Li}^+$ . This is because a polarizable continuum model can not fully capture the strong interactions between a bare ion and the implicit solvents.<sup>3</sup> In order to calculate  $\Delta G^*(\text{Li}^+(s))$  accurately, we further employed the cluster-continuum model,<sup>3</sup> because it includes explicitly the coordination structure of a solvated ion, and can remedy the nonunique definition of cavity or ion-solvent boundary in implicit solvation model.

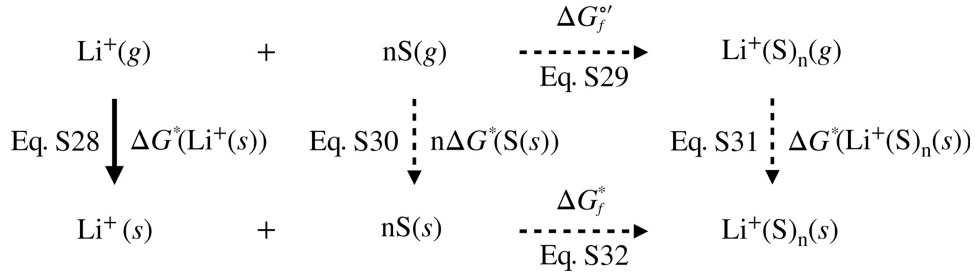

**Figure. S1.** Thermodynamic cycle for the cluster-continuum model,<sup>3</sup> in which  $s$  denotes a solvent molecule ( $\text{H}_2\text{O}$ ,  $\text{AN}$ ,  $\text{TMS}$ ,  $\text{PC}$ ,  $\text{DOL}$ ,  $\text{THF}$ ,  $\text{DME}$ ,  $\text{DMA}$ ,  $\text{DMSO}$ ,  $\text{TMU}$ , and  $\text{DCE}$ ) and  $\text{Li}^+(\text{S})_n$  denotes the cluster consisting of Li-ion coordinating with  $n$  solvent molecules ( $\text{S}$ ), while ( $s$ ) and ( $g$ ) denotes the solution phase and the gas-phase, respectively. The individual reactions and the Gibbs free energies are described in the text with the corresponding equation numbers.

The calculation of  $\Delta G^*(\text{Li}^+(s))$  in Eq. S28 with cluster-continuum model<sup>3</sup> is illustrated by the thermodynamic cycle in Figure S1. Apart from Eq. S28, the other reactions in Figure S1, with the corresponding free energies, are

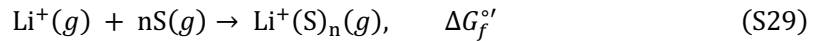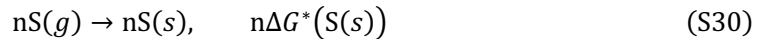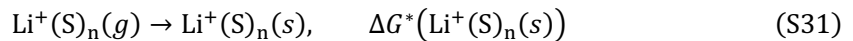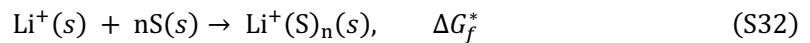

in which  $\text{Li}^+(\text{S})_n(g)$  is the optimized cluster in the gas-phase, with  $n$  the coordinating solvent molecules, as depicted in Table S2.

In Eq. S29,  $\Delta G_f^{\circ'}$  is the Gibbs free energy of formation of  $\text{Li}^+(\text{S})_n$  cluster in gas phase, which can be obtained by consulting Table S2, with an additional conversion,  $\Delta G^{\circ \rightarrow \circ'}$ , in order to transform from the gas-phase standard state ( $P = 1$  atm and  $T = 298.15$  K) to the Ben-Naim convention ( $c_0 = 1$  M and  $T = 298.15$  K),<sup>19</sup> *i.e.*,

$$\Delta G^{\circ \rightarrow \circ'} = RT \ln \frac{V_A}{V_0} = 1.89 \text{ kcal} \cdot \text{mol}^{-1} \quad (\text{S33})$$

in which  $V_A$  is given by Eq. S6 and  $V_0 = 0.001 \text{ m}^3$ . Thus,

$$\Delta G_f^{\circ'} = \Delta G_f^{\circ} - n \cdot \Delta G^{\circ \rightarrow \circ'} \quad (\text{S34})$$

in which  $\Delta G_f^{\circ}$  is tabulated in Table S2.

The self-solvation Gibbs free energies of the solvent molecule  $\text{S}$  in its own solvent ( $s$ ),  $\Delta G^*(\text{S}(s))$ , and the Gibbs free energy of solvation of the  $\text{Li}^+(\text{S})_n$  cluster in solvent ( $s$ )  $\Delta G^*(\text{Li}^+(\text{S})_n(s))$  in Eqs. S30 and S31 were calculated with SMD solvation model,<sup>4</sup> using the solvent descriptors listed in Table S1.  $\Delta G^*(\text{S}(s))$  can be calculated accurately with SMD solvation model for the neutral molecule within  $1 \text{ kcal} \cdot \text{mol}^{-1}$ .<sup>4</sup> For the  $\text{Li}^+(\text{S})_n$  cluster, since  $\text{Li}^+$  is embedded in the explicit  $n$  coordinating solvent molecules ( $\text{S}$ ),  $\Delta G^*(\text{Li}^+(\text{S})_n(s))$  can also be calculated accurately.<sup>20</sup>

Eq. S32 represents a hypothesis reaction for the formation of the  $\text{Li}^+(\text{s})_n$  cluster in the solvent. Assuming ideal solution, the corresponding equilibrium constant is

$$K = \frac{[\text{Li}^+(\text{S})_n]}{[\text{Li}^+][\text{S}]^n} = \frac{1}{[\text{S}]^n} \quad (\text{S35})$$

in which  $[\text{Li}^+(\text{S})_n] = [\text{Li}^+] = 1 \text{ M}$  for the concentration corresponding to the standard state of solution, and  $[\text{S}]$  is the concentration of the solvent. Neglecting the change of volume on dissolving  $\text{Li}^+$  salt,  $[\text{S}]$  remains the same as that of the neat solvent, *i.e.*,

$$[\text{S}] = \frac{\rho_s}{M_s} \quad (\text{S36})$$

in which  $\rho_s$  and  $M_s$  are the mass density of the neat solvent<sup>21</sup> and the molar mass of the solvent, respectively. Thus, the corresponding Gibbs free energy of formation of  $\text{Li}^+(\text{S})_n$  cluster in solution for the reaction in Eq. S32 is

$$\Delta G_f^* = -RT \ln K = nRT \ln [\text{S}] \quad (\text{S37})$$

Since the reference standard state in solution corresponds to  $c_0 = 1 \text{ M}$ ,  $\ln[\text{S}]$  is understood to be dimensionless since the unit of the concentration in M is cancel with that of the standard state.

As demonstrated in Figure S1, Eq. S28 can be represented by

$$\text{Eq. S28} = \text{Eq. S29} - \text{Eq. S30} + \text{Eq. S31} - \text{Eq. S32},$$

the corresponding  $\Delta G^*(\text{Li}^+(s))$  in a solvent ( $s = \text{H}_2\text{O}$ , AN, TMS, PC, DOL, THF, DME, DMA, DMSO, TMU, and DCE) can be calculated by

$$\Delta G^*(\text{Li}^+(s)) = \Delta G_f^{\circ'} - n \cdot \Delta G^*(S(s)) + \Delta G^*(\text{Li}^+(S)_n(s)) - \Delta G_f^* \quad (\text{S38})$$

in which  $\Delta G_f^{\circ'}$  and  $\Delta G_f^*$  are given by Eqs. S34 and S37, respectively, and  $\Delta G^*(S(s))$  and  $\Delta G^*(\text{Li}^+(S)_n(s))$  are calculated by the SMD solvation model<sup>4</sup> using the solvent descriptors listed in Table S1.

Table S3 lists the Gibbs free energies of the individual reactions corresponding to the thermodynamic cycle in Figure S1. It is of interest to note that  $\Delta G^*(\text{Li}^+(S)_n(s))$  of THF, DME, DMA, DMSO, and TMU are very similar, and such observation is in agreement with TATB assumption,<sup>22</sup> in the sense that the Gibbs free energy of solvation of a bulk ion with embedded ionic center surrounded by large neutral functional groups are insensitive to the solvent. Meanwhile, an accurate gas-phase Gibbs free energy of formation,  $\Delta G_f^{\circ'}$ , is important for the calculation of  $\Delta G^*(\text{Li}^+(s))$  with the cluster-continuum model.<sup>23</sup>

**Table S3.**  $\Delta G_f^{\circ'}$ ,  $\Delta G^*(S(s))$ ,  $\Delta G^*(\text{Li}^+(S)_n(s))$ ,  $\Delta G_f^*$ , and  $\Delta G^*(\text{Li}^+(s))$  in ( $\text{kcal} \cdot \text{mol}^{-1}$ ), corresponding the reactions in the thermodynamic cycle in Figure S3.

| S (s)            | $\Delta G_f^{\circ' a}$ | $\Delta G^*(S(s))^b$ | $\Delta G^*(\text{Li}^+(S)_n(s))^b$ | $\Delta G_f^{* c}$ | $\Delta G^*(\text{Li}^+(s))^d$ |
|------------------|-------------------------|----------------------|-------------------------------------|--------------------|--------------------------------|
| H <sub>2</sub> O | -85.70                  | -9.56                | -64.15                              | 9.51               | -121.12                        |
| AN               | -88.73                  | -6.51                | -45.60                              | 6.99               | -115.3                         |
| TMS              | -97.17                  | -12.63               | -53.09                              | 4.19               | -116.6                         |
| PC               | -92.90                  | -9.41                | -50.53                              | 5.85               | -111.6                         |
| DOL              | -81.42                  | -4.12                | -42.91                              | 6.31               | -114.2                         |
| THF              | -90.02                  | -4.26                | -41.46                              | 5.94               | -120.4                         |
| DME              | -89.91                  | -4.70                | -40.89                              | 2.68               | -124.1                         |
| DMA              | -107.69                 | -7.72                | -41.16                              | 5.64               | -123.6                         |
| DMSO             | -120.33                 | -8.76                | -41.46                              | 6.27               | -133.0                         |
| TMU              | -109.76                 | -8.76                | -41.84                              | 5.03               | -121.6                         |
| DCE              | -54.86                  | -7.52                | -52.31                              | 3.01               | -95.14                         |

<sup>a</sup>Eq. S34; <sup>b</sup>Calculated by SMD solvation model<sup>4</sup> at M06-2X/6-31+G(d) level of theory,<sup>1</sup> using the gas-phase optimized structure at the same level of theory; <sup>c</sup>Eq. S37; <sup>d</sup>Eq. S38.

#### S4. $\Delta_{\text{fus}}S$ of the solvent.

The melting of solvent ( $s$ ) is the equilibrium between solid and liquid phases, *i.e.*,

$$s(solid) \rightarrow s(liquid) \quad (S39)$$

Since the chemical potentials of  $s(solid)$  and  $s(liquid)$  are equal at the melting point, the Gibbs free energy of fusion  $\Delta_{fus}G$  is zero, i.e.,

$$\Delta_{fus}G = \Delta_{fus}H - T_{fus}\Delta_{fus}S = 0 \quad (S40)$$

in which  $\Delta_{fus}H$  is the enthalpy of fusion of solvent ( $s$ ), and  $T_{fus}$  is the melting point, both of which can be obtained by check NIST chemistry webbook,<sup>21</sup> and listed in Table S4. From Eq. S40, the entropy of fusion of solvent ( $s$ )  $\Delta_{fus}S$  can be calculated by

$$\Delta_{fus}S = \frac{\Delta_{fus}H}{T_{fus}} \quad (S41)$$

The calculated  $\Delta_{fus}S$  of different solvent ( $s$ ), along with  $\Delta_{fus}H$  and  $T_{fus}$ , are listed in Table S4.

**Table S4.** List of  $\Delta_{fus}H$ ,  $T_{fus}$ , and  $\Delta_{fus}S$  of solvent ( $s$ ).

| $s$              | $\Delta_{fus}H^a$ | $T_{fus}^b$ | $\Delta_{fus}S^c$ |
|------------------|-------------------|-------------|-------------------|
| H <sub>2</sub> O | 1.44              | 273.2       | 5.27              |
| AN               | 1.95              | 229.3       | 8.52              |
| TMS              | 0.33              | 301.7       | 1.09              |
| PC               | 2.14              | 220.3       | 9.72              |
| DOL              | 1.57              | 175.9       | 8.93              |
| THF              | 2.04              | 164.8       | 12.39             |
| DME              | 3.00              | 203.9       | 14.72             |
| DMA              | 2.44              | 254.2       | 9.59              |
| DMSO             | 3.35              | 291.7       | 11.77             |
| TMU              | 3.43              | 272.1       | 12.30             |
| DCE              | 2.11              | 273.2       | 7.72              |

<sup>a</sup>Enthalpy of fusion (kcal · mol<sup>-1</sup>);<sup>21</sup> <sup>b</sup>Melting temperature (K);<sup>21</sup> <sup>c</sup>Entropy of fusion by Eq. S41 (cal · mol<sup>-1</sup> · K<sup>-1</sup>).

#### S5. The physical meaning of the fitting parameters in Eqs. (4) and (5) in the main text.

As shown in the inset of Fig. 2 in the main text, the fitted  $b = 3.05$  may be considered as the effective coordination number of the solvents. Though different solvent may favour different coordination number as demonstrated in Table S2, it is not easily justified *a priori*. We thus adopt a universal  $b$ , and suggest to use the modified donor number by entropy of solvation, i.e.,  $DN'$  defined in Eq. (4) in the main text, as indicator of  $\Delta G^*(Li^+(s))$  or  $E^\ominus(Li/Li^+(s))$ . The correlation between the newly defined  $DN'$  and  $\Delta G^*(Li^+(s))$  or  $E^\ominus(Li/Li^+(s))$  is reflected in the fitness of Eq. (5) in the main text, as shown in Fig. 2 in the main text.

In Tables S1 – S4, we also list the relevant parameter of DCE as well as the computed  $\Delta G^*(\text{Li}^+(\text{DCE}))$ , though it is not generally adopted as solvent in lithium-metal battery. Since DCE is defined to be the reference with  $DN(\text{DCE}) = 0 \text{ kcal} \cdot \text{mol}^{-1}$ ,<sup>24</sup> it may be employed to understand the physical meaning of the fitting parameters of  $a = -0.81$  and  $c = -106.33 \text{ kcal} \cdot \text{mol}^{-1}$ . Taking  $\Delta_{\text{fus}}S(\text{DCE}) = 7.72 \text{ cal} \cdot \text{mol}^{-1} \cdot \text{K}^{-1}$  from Table S4,  $DN'(\text{DCE}) = -7.02 \text{ kcal} \cdot \text{mol}^{-1}$  according to Eq. (4) in the main text with  $T = 298.15 \text{ K}$ . Further applying  $a$ ,  $b$ , and  $DN'(\text{DCE})$  in Eq. (5) in the main text, we have the extrapolated Gibbs free energy of solvation of  $\text{Li}^+$  in DCE,  $\Delta G^*(\text{Li}^+(\text{DCE})) = -100.64 \text{ kcal} \cdot \text{mol}^{-1}$ , which is in accord with the computed  $\Delta G^*(\text{Li}^+(\text{DCE})) = -95.14 \text{ kcal} \cdot \text{mol}^{-1}$  in Table S3. From the above observation, the physical meaning of  $c$  may be attributed to the enthalpy of solvation of  $\text{Li}^+$  in DCE. For fitted  $a = -0.81$ , is the universal scaling parameter that measures the negative relation between  $DN'$  and  $\Delta G^*(\text{Li}^+(s))$ . Though the physical meaning needs more in-depth understanding, it reflects the negative correlation between  $DN'$  and  $\Delta G^*(\text{Li}^+(s))$  or  $E^\ominus(\text{Li}/\text{Li}^+(s))$ .

Based on the above discussion, it can be seen that while  $DN$  proposed by Gutmann<sup>24</sup> is a measure of the Lewis basicity of a solvent in terms of enthalpy of solvation,  $DN'$  measures Lewis basicity of a solvent in terms of Gibbs free energy of solvation. Thus, it is reasonable that the correlation between  $DN'$  and  $\Delta G^*(\text{Li}^+(s))$  or  $E^\ominus(\text{Li}/\text{Li}^+(s))$  is improved, and a higher  $DN'$  correlates with more negative  $\Delta G^*(\text{Li}^+(s))$  as well as  $E^\ominus(\text{Li}/\text{Li}^+(s))$  in an unambiguous manner.

## References

- 1 Y. Zhao and D. G. Truhlar, *Theor. Chem. Acc.*, 2008, **120**, 215–241.
- 2 S. Grimme, J. Antony, S. Ehrlich and H. Krieg, *J. Chem. Phys.*, 2010, **132**, 154104.
- 3 J. R. Pliego and J. M. Riveros, *J. Phys. Chem. A*, 2001, **105**, 7241–7247.
- 4 A. V. Marenich, C. J. Cramer and D. G. Truhlar, *J. Phys. Chem. B*, 2009, **113**, 6378–6396.
- 5 M. J. Frisch, G. W. Trucks, H. B. Schlegel, G. E. Scuseria, M. A. Robb, J. R. Cheeseman, G. Scalmani, V. Barone, G. A. Petersson, H. Nakatsuji, X. Li, M. Caricato, A. V. Marenich, J. Bloino, B. G. Janesko, R. Gomperts, B. Mennucci, H. P. Hratchian, J. V. Ortiz, A. F. Izmaylov, J. L. Sonnenberg, Williams, F. Ding, F. Lipparini, F. Egidi, J. Goings, B. Peng, A. Petrone, T. Henderson, D. Ranasinghe, V. G. Zakrzewski, J. Gao, N. Rega, G. Zheng, W. Liang, M. Hada, M. Ehara, K. Toyota, R. Fukuda, J. Hasegawa, M. Ishida, T. Nakajima, Y. Honda, O. Kitao, H. Nakai, T. Vreven, K. Throssell, J. A. Montgomery Jr., J. E. Peralta, F. Ogliaro, M. J. Bearpark, J. J. Heyd, E. N. Brothers, K. N. Kudin, V. N. Staroverov, T. A. Keith, R. Kobayashi, J. Normand, K. Raghavachari, A. P. Rendell, J. C. Burant, S. S. Iyengar, J. Tomasi, M. Cossi, J. M. Millam, M. Klene, C. Adamo,

- R. Cammi, J. W. Ochterski, R. L. Martin, K. Morokuma, O. Farkas, J. B. Foresman and D. J. Fox, *Gaussian 16 Rev. C.01*, Wallingford, CT, 2016.
- 6 W. M. Haynes, *CRC Handbook of Chemistry and Physics*, CRC press, 2014.
- 7 M. H. Abraham, *J. Phys. Org. Chem.*, 1993, **6**, 660–684.
- 8 M. D. Lechner and C. Wohlfarth, *Static Dielectric Constants of Pure Liquids and Binary Liquid Mixtures (Supplement to Volume IV/17)*, Berlin: Springer-Verlag, 2008.
- 9 C. Wohlfarth and B. Wohlfarth, *Refractive Indices of Organic Liquids*, Springer, 1996, vol. 38.
- 10 C. Wohlfarth, B. Wohlfarth, M. D. Lechner, H. Landolt and R. Börnstein, *Surface Tension of Pure Liquids and Binary Liquid Mixtures*, Springer, 1997, vol. 16.
- 11 R. Luckenback, *Beilstein: Handbook of Organic Chemistry*, Springer-Verlag, 1984.
- 12 G. Zhao, S. Bi, X. Li and J. Wu, *Fluid Ph. Equilibria*, 2010, **295**, 46–49.
- 13J. Riddick and W. B. Bunger, *Organic Solvents: Physical Properties and Methods of Purification*, Wiley-Interscience, 1970.
- 14 M. H. Abraham, H. S. Chadha, G. S. Whiting and R. C. Mitchell, *J. Pharm. Sci.*, 1994, **83**, 1085–1100.
- 15 T. L. Hill, *An Introduction to Statistical Thermodynamics*, Courier Corporation, 1986.
- 16 S. Grimme, *Chem. Eur. J.*, 2012, **18**, 9955–9964.
- 17 Q. Liu, F. Wu, D. Mu and B. Wu, *Chin. Phys. B*, 2020, **29**, 048202.
- 18 G. Lamoureux and B. Roux, *J. Phys. Chem. B*, 2006, **110**, 3308–3322.
- 19 A. Ben-Naim, *J. Phys. Chem.*, 1978, **82**, 792–803.
- 20 J. R. Pliego Jr and J. M. Riveros, *WIREs Comput. Mol. Sci.*, 2020, **10**, e1440.
- 21 P. Linstorm, *J. Phys. Chem. Ref. Data, Monograph*, 1998, **9**, 1–1951.
- 22 E. Grunwald, G. Baughman and G. Kohnstam, *J. Am. Chem. Soc.*, 1960, **82**, 5801–5811.
- 23 N. F. Carvalho and J. R. Pliego, *Phys. Chem. Chem. Phys.*, 2015, **17**, 26745–26755.
- 24 V. Gutmann, *Electrochim. Acta*, 1976, **21**, 661–670.
